# Supplementary material for: Combined small and large magnetic nanoparticle extraction and concentration from biofluids for non-toxic detection of biomarkers
Source: Royal Society of Chemistry journal article supplement (doi:10.1039/d2sd00078d), 2022-01-01
Supplement: d2sd00078d1.pdf [file d2sd00078d1.pdf]

*Electronic Supplementary Information*

**Combined small and large magnetic nanoparticles extraction and concentration from biofluids for non-toxic detection of biomarkers**

Anatoliy S. Lapchuk,<sup>1\*</sup> Ivan V. Gorbov<sup>1</sup>, Alexander V. Prygun<sup>1</sup>, Iryna V. Balagura<sup>1</sup>, and Yevhenii M. Morozov<sup>1,2\*</sup>

<sup>1</sup>Department of Optical Engineering, Institute for Information Recording of NAS of Ukraine, 03113 Kyiv, Ukraine

<sup>2</sup>Biosensor Technologies, AIT-Austrian Institute of Technology, 3430 Tulln, Austria

\*Corresponding authors:

Anatoliy S. Lapchuk (email: [alapchuk@yahoo.com](mailto:alapchuk@yahoo.com))

Yevhenii M. Morozov (email: [Yevhenii.Morozov@ait.ac.at](mailto:Yevhenii.Morozov@ait.ac.at))

## List of the mathematical notations

$\vec{V}_0$  – displacement speed of the LmNPs relatively to SmNPs (*NB!* At the same time, this quantity determines the gradient of the external magnetic field).

$\mu_0$  – relative magnetic permeability of the vacuum.

$\mu$  – relative magnetic permeability of the biofluid medium.

$\mu_{NP}$  – (fixed) relative magnetic permeability of the mNPs (regardless of the mNP's sort).

$\mu_s$  – relative magnetic permeability of the SmNPs.

$M_{sat}$  – (fixed) saturation magnetisation of the mNPs (regardless of the mNP's sort).

$\vec{M}$  – magnetisation of an mNP (regardless of the mNP's sort).

$\vec{B}_0$  – magnetic flux density of the external system of permanent magnets.

$\vec{B}$  – magnetic flux density created by a uniformly magnetized spherical mNP.

$\vec{B}_{ext}$  – external magnetic flux density.

$\vec{B}_l$  – magnetic flux density of an LmNP nearest to the considered SmNP.

$\vec{v}_i$  – velocities of the small mNPs ( $i = 1, 2, 3, \dots, n$ ; where  $n$  – number of small NPs).

$R$  – radius of an mNP (regardless of the mNP's sort).

$R_s$  – (external) radius of the SmNPs.

$R_l$  – (external) radius of the LmNPs.

$R_m$  – radius of an mNP's magnetic core (regardless of the mNP's sort).

$R_{sm}$  – radius of the magnetic core the SmNPs.

$R_{lm}$  – radius of the magnetic core the LmNPs.

$\vec{r}$  – radius-vector from the centre of an NP to the point of the magnetic field determination.

$\vec{r}_s$  – radius-vector (coordinates) of an SmNP.

$\vec{r}_l$  – radius-vector (coordinates) of an LmNP.

$\vec{m}$  – magnetic moment of an mNP (regardless of the mNP's sort).

$\vec{m}_s$  – magnetic moment of an SmNP.

$\vec{m}_l$  – magnetic moment of an LmNP.

$\pi$  – the number  $\pi$ .

$V_s$  – volume of an SmNP.

$\vec{F}$  – force of the mNPs interaction.

$E$  – energy of the mNPs interaction.

$\vec{\nabla}$  – del (nabla) operator.
